# Supplementary material
Source: Springer Nature journal article supplement (https://www.springermedizin.de/resource/supplementary/13024_2009_86_MOESM3_ESM.pdf/9643362)
Supplement: MOESM3 [file 9643362]

| <b><math>\gamma</math>-Secretase Inhibitor</b> | <b>Structure</b>                                                                   | <b>In Vitro (nM)</b> | <b>Cell-based (nM)</b> | <b>Exo-Cell (nM)</b> | <b>Extended Exo-Cell (nM)</b> |
|------------------------------------------------|------------------------------------------------------------------------------------|----------------------|------------------------|----------------------|-------------------------------|
| <b>Compound E</b>                              | 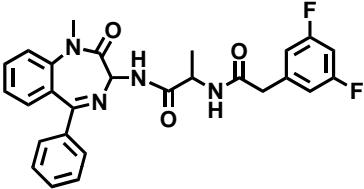 | <b>1.2</b>           | <b>4.6</b>             | <b>3.8</b>           | <b>2.8</b>                    |
| <b>GSI-34</b>                                  |  | <b>1.0</b>           | <b>32.4</b>            | <b>5.9</b>           | <b>39.0</b>                   |
